# Supplementary material for: National survey of UK medical students on the perception of neurology
Source: PubMed Central journal article supplement (PMC4295337; doi:10.1186/1472-6920-14-225), 2014-10-21
Supplement: 12909_2014_1101_MOESM1_ESM.pdf [file 12909_2014_1101_MOESM1_ESM.pdf]

# National Survey of Medical Students on the Perception of Neurology

1.

## 1. What is your age?

## 2. What is your gender?

Female

Male

## 3. Which medical school do you attend?

Other (please specify)

## 4. What type of medical course are you on?

Undergraduate

Mature undergraduate

Graduate

## 5. How long is your medical school course (including the intercalated year if applicable)?

## 6. What is your expected year of graduation?

Other (please specify)

## 7. How difficult do you think it is for students to learn about the following areas of medicine?

|                      | Very difficult        | Difficult             | Moderate              | Easy                  | Very easy             | No teaching given     |
|----------------------|-----------------------|-----------------------|-----------------------|-----------------------|-----------------------|-----------------------|
| Cardiology           | <input type="radio"/> | <input type="radio"/> | <input type="radio"/> | <input type="radio"/> | <input type="radio"/> | <input type="radio"/> |
| Gastroenterology     | <input type="radio"/> | <input type="radio"/> | <input type="radio"/> | <input type="radio"/> | <input type="radio"/> | <input type="radio"/> |
| Respiratory medicine | <input type="radio"/> | <input type="radio"/> | <input type="radio"/> | <input type="radio"/> | <input type="radio"/> | <input type="radio"/> |
| Neurology            | <input type="radio"/> | <input type="radio"/> | <input type="radio"/> | <input type="radio"/> | <input type="radio"/> | <input type="radio"/> |
| Endocrinology        | <input type="radio"/> | <input type="radio"/> | <input type="radio"/> | <input type="radio"/> | <input type="radio"/> | <input type="radio"/> |
| Rheumatology         | <input type="radio"/> | <input type="radio"/> | <input type="radio"/> | <input type="radio"/> | <input type="radio"/> | <input type="radio"/> |
| Geriatrics           | <input type="radio"/> | <input type="radio"/> | <input type="radio"/> | <input type="radio"/> | <input type="radio"/> | <input type="radio"/> |

# National Survey of Medical Students on the Perception of Neurology

## 8. How comfortable are you in your ability to examine patients with disorders related to the following medical areas?

|                      | Very uncomfortable    | Uncomfortable         | Moderately            | Comfortable           | Very comfortable      | No teaching given     |
|----------------------|-----------------------|-----------------------|-----------------------|-----------------------|-----------------------|-----------------------|
| Cardiology           | <input type="radio"/> | <input type="radio"/> | <input type="radio"/> | <input type="radio"/> | <input type="radio"/> | <input type="radio"/> |
| Gastroenterology     | <input type="radio"/> | <input type="radio"/> | <input type="radio"/> | <input type="radio"/> | <input type="radio"/> | <input type="radio"/> |
| Respiratory medicine | <input type="radio"/> | <input type="radio"/> | <input type="radio"/> | <input type="radio"/> | <input type="radio"/> | <input type="radio"/> |
| Neurology            | <input type="radio"/> | <input type="radio"/> | <input type="radio"/> | <input type="radio"/> | <input type="radio"/> | <input type="radio"/> |
| Endocrinology        | <input type="radio"/> | <input type="radio"/> | <input type="radio"/> | <input type="radio"/> | <input type="radio"/> | <input type="radio"/> |
| Rheumatology         | <input type="radio"/> | <input type="radio"/> | <input type="radio"/> | <input type="radio"/> | <input type="radio"/> | <input type="radio"/> |
| Geriatrics           | <input type="radio"/> | <input type="radio"/> | <input type="radio"/> | <input type="radio"/> | <input type="radio"/> | <input type="radio"/> |

## 9. How comfortable are you in drawing up a differential diagnosis for patients presenting with symptoms in the following area

|                      | Very uncomfortable    | Uncomfortable         | Moderately            | Comfortable           | Very comfortable      | No teaching given     |
|----------------------|-----------------------|-----------------------|-----------------------|-----------------------|-----------------------|-----------------------|
| Cardiology           | <input type="radio"/> | <input type="radio"/> | <input type="radio"/> | <input type="radio"/> | <input type="radio"/> | <input type="radio"/> |
| Gastroenterology     | <input type="radio"/> | <input type="radio"/> | <input type="radio"/> | <input type="radio"/> | <input type="radio"/> | <input type="radio"/> |
| Respiratory medicine | <input type="radio"/> | <input type="radio"/> | <input type="radio"/> | <input type="radio"/> | <input type="radio"/> | <input type="radio"/> |
| Neurology            | <input type="radio"/> | <input type="radio"/> | <input type="radio"/> | <input type="radio"/> | <input type="radio"/> | <input type="radio"/> |
| Endocrinology        | <input type="radio"/> | <input type="radio"/> | <input type="radio"/> | <input type="radio"/> | <input type="radio"/> | <input type="radio"/> |
| Rheumatology         | <input type="radio"/> | <input type="radio"/> | <input type="radio"/> | <input type="radio"/> | <input type="radio"/> | <input type="radio"/> |
| Geriatrics           | <input type="radio"/> | <input type="radio"/> | <input type="radio"/> | <input type="radio"/> | <input type="radio"/> | <input type="radio"/> |

## 10. How would you rate the quality of the teaching you have received in the following medical areas?

|                      | Very poor             | Poor                  | Satisfactory          | Good                  | Very good             | No teaching given     |
|----------------------|-----------------------|-----------------------|-----------------------|-----------------------|-----------------------|-----------------------|
| Cardiology           | <input type="radio"/> | <input type="radio"/> | <input type="radio"/> | <input type="radio"/> | <input type="radio"/> | <input type="radio"/> |
| Gastroenterology     | <input type="radio"/> | <input type="radio"/> | <input type="radio"/> | <input type="radio"/> | <input type="radio"/> | <input type="radio"/> |
| Respiratory medicine | <input type="radio"/> | <input type="radio"/> | <input type="radio"/> | <input type="radio"/> | <input type="radio"/> | <input type="radio"/> |
| Neurology            | <input type="radio"/> | <input type="radio"/> | <input type="radio"/> | <input type="radio"/> | <input type="radio"/> | <input type="radio"/> |
| Endocrinology        | <input type="radio"/> | <input type="radio"/> | <input type="radio"/> | <input type="radio"/> | <input type="radio"/> | <input type="radio"/> |
| Rheumatology         | <input type="radio"/> | <input type="radio"/> | <input type="radio"/> | <input type="radio"/> | <input type="radio"/> | <input type="radio"/> |
| Geriatrics           | <input type="radio"/> | <input type="radio"/> | <input type="radio"/> | <input type="radio"/> | <input type="radio"/> | <input type="radio"/> |

# National Survey of Medical Students on the Perception of Neurology

**11. Please rank the following specialties by how likely you are to want to pursue a career in each specialty:**

|                      |                                             |                              |
|----------------------|---------------------------------------------|------------------------------|
| <input type="text"/> | Cardiology                                  | <input type="checkbox"/> N/A |
| <input type="text"/> | Gastroenterology                            | <input type="checkbox"/> N/A |
| <input type="text"/> | Respiratory medicine                        | <input type="checkbox"/> N/A |
| <input type="text"/> | Neurology                                   | <input type="checkbox"/> N/A |
| <input type="text"/> | Endocrinology                               | <input type="checkbox"/> N/A |
| <input type="text"/> | Rheumatology                                | <input type="checkbox"/> N/A |
| <input type="text"/> | Geriatrics                                  | <input type="checkbox"/> N/A |
| <input type="text"/> | Not interested in pursuing any of the above | <input type="checkbox"/> N/A |

## 2.

### 12. Have you had any personal experience (outside of your medical course) of caring for someone with a neurological disorder?

|                                                                                                             | Yes                   | No                    |
|-------------------------------------------------------------------------------------------------------------|-----------------------|-----------------------|
| Cared for a relative or a friend suffering from a neurological disorder                                     | <input type="radio"/> | <input type="radio"/> |
| Cared for someone suffering from a neurological disorder through volunteer work in a healthcare environment | <input type="radio"/> | <input type="radio"/> |
| Cared for someone suffering from a neurological disorder through paid work                                  | <input type="radio"/> | <input type="radio"/> |

Other (please specify)

### 13. To what extent have you covered neurology teaching so far in your course (if "not at all", please continue to the next page)

- Not at all
- Pre-clinical neuroscience only
- Clinical neurology only
- Both pre-clinical neuroscience and clinical neurology

### 14. Do you think the amount of planned teaching in neurology you have received was: Too little/about right/too much

- Too little
- About right
- Too much

Other (please specify)

# National Survey of Medical Students on the Perception of Neurology

## 15. Have you had the opportunity so far in your medical course to do the following:

|                                                                                                    | Opportunity available and taken | Opportunity available but not taken | Opportunity not available |
|----------------------------------------------------------------------------------------------------|---------------------------------|-------------------------------------|---------------------------|
| The opportunity to carry out a research project in a topic related to neurology                    | <input type="radio"/>           | <input type="radio"/>               | <input type="radio"/>     |
| The opportunity to receive additional neurology teaching beyond course curriculum                  | <input type="radio"/>           | <input type="radio"/>               | <input type="radio"/>     |
| The opportunity to discuss neurological cases through problem-based learning or case-presentations | <input type="radio"/>           | <input type="radio"/>               | <input type="radio"/>     |
| Carry out a clinical placement in neurology                                                        | <input type="radio"/>           | <input type="radio"/>               | <input type="radio"/>     |
| Meet a neurologist who has inspired you                                                            | <input type="radio"/>           | <input type="radio"/>               | <input type="radio"/>     |

## 16. To what extent do you think the following factors contribute to neurology being perceived as a difficult subject?

|                                                    | No contribution       | Small contribution    | Moderate contribution | Large contribution    | Very large contribution | Don't know            |
|----------------------------------------------------|-----------------------|-----------------------|-----------------------|-----------------------|-------------------------|-----------------------|
| Neuroanatomy                                       | <input type="radio"/> | <input type="radio"/> | <input type="radio"/> | <input type="radio"/> | <input type="radio"/>   | <input type="radio"/> |
| Learning basic neuroscience                        | <input type="radio"/> | <input type="radio"/> | <input type="radio"/> | <input type="radio"/> | <input type="radio"/>   | <input type="radio"/> |
| The clinical neurological examination              | <input type="radio"/> | <input type="radio"/> | <input type="radio"/> | <input type="radio"/> | <input type="radio"/>   | <input type="radio"/> |
| Lack of diagnostic certainty                       | <input type="radio"/> | <input type="radio"/> | <input type="radio"/> | <input type="radio"/> | <input type="radio"/>   | <input type="radio"/> |
| Poor quality/lack of teaching                      | <input type="radio"/> | <input type="radio"/> | <input type="radio"/> | <input type="radio"/> | <input type="radio"/>   | <input type="radio"/> |
| Lack of clinical exposure to neurological patients | <input type="radio"/> | <input type="radio"/> | <input type="radio"/> | <input type="radio"/> | <input type="radio"/>   | <input type="radio"/> |
| Other (please specify)                             | <input type="text"/>  |                       |                       |                       |                         |                       |

## 17. Please rank the following in the order in which they would most improve the neurology training at your medical school?

|                                         | 1                     | 2                     | 3                     | 4                     | 5                     | N/A                   |
|-----------------------------------------|-----------------------|-----------------------|-----------------------|-----------------------|-----------------------|-----------------------|
| More/improved online learning resources | <input type="radio"/> | <input type="radio"/> | <input type="radio"/> | <input type="radio"/> | <input type="radio"/> | <input type="radio"/> |
| More/improved text books                | <input type="radio"/> | <input type="radio"/> | <input type="radio"/> | <input type="radio"/> | <input type="radio"/> | <input type="radio"/> |
| More/improved lectures                  | <input type="radio"/> | <input type="radio"/> | <input type="radio"/> | <input type="radio"/> | <input type="radio"/> | <input type="radio"/> |
| More/improved bedside teaching          | <input type="radio"/> | <input type="radio"/> | <input type="radio"/> | <input type="radio"/> | <input type="radio"/> | <input type="radio"/> |
| More/improved peer discussions          | <input type="radio"/> | <input type="radio"/> | <input type="radio"/> | <input type="radio"/> | <input type="radio"/> | <input type="radio"/> |
| Other (please specify)                  | <input type="text"/>  |                       |                       |                       |                       |                       |

## 3.

### 18. How would you rate the following factors with regard to your perception of a career in neurology?

|                                                             | Very poor             | Poor                  | OK                    | Good                  | Very good             | Don't know            |
|-------------------------------------------------------------|-----------------------|-----------------------|-----------------------|-----------------------|-----------------------|-----------------------|
| Financial reward                                            | <input type="radio"/> | <input type="radio"/> | <input type="radio"/> | <input type="radio"/> | <input type="radio"/> | <input type="radio"/> |
| Job satisfaction                                            | <input type="radio"/> | <input type="radio"/> | <input type="radio"/> | <input type="radio"/> | <input type="radio"/> | <input type="radio"/> |
| Ability to make a significant difference to patient's lives | <input type="radio"/> | <input type="radio"/> | <input type="radio"/> | <input type="radio"/> | <input type="radio"/> | <input type="radio"/> |
| Male/female equality                                        | <input type="radio"/> | <input type="radio"/> | <input type="radio"/> | <input type="radio"/> | <input type="radio"/> | <input type="radio"/> |
| Opportunity for career progression                          | <input type="radio"/> | <input type="radio"/> | <input type="radio"/> | <input type="radio"/> | <input type="radio"/> | <input type="radio"/> |
| Opportunity for travel                                      | <input type="radio"/> | <input type="radio"/> | <input type="radio"/> | <input type="radio"/> | <input type="radio"/> | <input type="radio"/> |
| Research opportunities                                      | <input type="radio"/> | <input type="radio"/> | <input type="radio"/> | <input type="radio"/> | <input type="radio"/> | <input type="radio"/> |
| Team-work                                                   | <input type="radio"/> | <input type="radio"/> | <input type="radio"/> | <input type="radio"/> | <input type="radio"/> | <input type="radio"/> |
| Ability to maintain work-life balance                       | <input type="radio"/> | <input type="radio"/> | <input type="radio"/> | <input type="radio"/> | <input type="radio"/> | <input type="radio"/> |
| Prestige                                                    | <input type="radio"/> | <input type="radio"/> | <input type="radio"/> | <input type="radio"/> | <input type="radio"/> | <input type="radio"/> |

### 19. Which one factor is most likely to dissuade you from pursuing a career in neurology?

### 20. Which one factor is most likely to persuade you to pursue a career in neurology?

4.

**21. Do you feel you have had sufficient opportunity to get involved in activities related to neurology outside your medical course (such as invited speakers, conferences, journal clubs etc)?**

- Strongly disagree     Disagree     Neither agree nor disagree     Agree     Strongly agree     Don't know

**22. Do you feel confident that you know what neurologists do?**

- Strongly disagree     Disagree     Neither agree nor disagree     Agree     Strongly agree

**23. How likely are you to pursue a career in neurology?**

- Definitely not     Unlikely     Neither likely nor unlikely     Likely     Definitely will     Don't know

**24. We welcome any other comments you may have on your perception and experience of neurology and how this can be improved:**

**25. Thank you for taking part in this survey.**

**All information in this survey is treated anonymously. However, in order to take part in our prize-draw of £300 please enter your email here. Your email will ONLY be used in the prize-draw and will be discarded as soon as the prize-draw is complete. Email address (optional):**
